# Supplementary material for: Developing the Standards of Meta-accreditation System of Educational Accreditation Systems in Iran
Source: Research Square preprint supplement (doi:10.21203/rs.3.rs-6768707/v1), 2025-07-10
Supplement: Supplementary file 1 [file 4ed02d03025fea22e4da0197.docx]

| 1. **structure and eligibility** |
| --- |
| - 1. **Mission and purposes:**      1. The mission and role of the accreditation body are clearly defined, approved by relevant authority, and publicly communicated.      2. The accrediting body respects the independence and goals of accredited institutions, recognizing that institutions are primarily responsible for their own quality. |
| - 1. **Structure:**       1. The accrediting body is formally recognized, accountable to stakeholders, and its decisions are enforceable.      2. The accrediting body has a coherent structure with a council, committees, and a decision-making board, supported by internal bylaw for process oversight.      3. The structure and processes of the accrediting body include sufficient mechanisms to ensure the participation of relevant stakeholders (such as experts, related associations, universities of medical sciences, teaching hospitals, and students). |
| - 1. **Standards:**       1. Accreditation standards are described to allow compliance while accommodating institutional diversity.      2. Standards are developed through a structured process, involving literature reviews, stakeholder input, and expert consensus.      3. The compiled standards are comprehensive.      4. The compiled standards are clear, easy to understand, and well-stated.      5. The standards have been reviewed and approved following a formal process by a valid approving body (High Planning Council).      6. Accreditation standards are readily accessible to institutions and programs.      7. Accreditation standards are periodically updated with input from stakeholders. |
| - 1. **Resource management:**       1. The accrediting body has sufficient financial, physical and the technological resources to conduct accreditation processes.      2. Adequate human resources are allocated for timely accreditation, based on established protocols.      3. The accrediting body utilizes available resources and facilities efficiently, avoiding additional costs or burdens on institutions and programs during the accreditation processes. |
| 1. **Accreditation processes** |
| - 1. **Internal evaluation**      1. The accrediting body provides guidelines for internal evaluation and requires accredited institutions and programs to conduct regular self-assessments to ensure compliance with standards.      2. The accrediting body provides an online system for institutions and programs to upload internal evaluation documents |
| - 1. **External evaluation**       1. An external visit is scheduled shortly after internal evaluation, with established guidelines for assessment.      2. The accrediting body periodically conducts external visits to programs or institutions and provides external evaluation guidelines.      3. External evaluations are conducted reliably and based on pre-established processes and procedures, with a focus on reviewing and verifying internal evaluation documents to ensure information is current.      4. The duration of each visit is sufficient to evaluate all required standards and details, while minimizing additional costs and workload for the institutions or programs.      5. The accrediting body has a clearly defined process for selecting external evaluators and adheres to it without external influence.      6. The number and expertise of external evaluation team members are appropriate for the program or institution being evaluated.      7. The initial and final meetings of the visiting team with the main representatives of the program or institution are conducted according to the accrediting body’s guidelines.      8. The external evaluation team prepares a report based on the internal evaluation documents and information collected during the visit.      9. The accrediting body has an approved ethical guide and monitors external evaluators, institutions, and programs for compliance, taking action as needed in cases of violations.      10. Policies and procedures are in place to manage conflicts of interest for all stakeholders involved in the accreditation process. |
| - 1. **Counseling and training**   2-3-1- The accrediting body designs and implements guides, materials and training programs for trustees, executives, and evaluators suitable platforms for advice and training.  2-3-2- The accrediting body provides mechanisms for institutions and programs to access necessary information and guidance during the accreditation process. |
| - 1. **Decision making**       1. The accrediting body has formulated and approved policies and procedures for decision-making and issuing preliminary accreditation vote, based on the external evaluation report and quorum requirements.      2. Policies and procedures ensure that accreditation decisions are based on compliance with standards.      3. The accrediting body maintains independence in issuing accreditation votes, ensuring decisions are made neutrally and free from conflicts of interest.      4. Qualified, credible, and experienced individuals review the external evaluation report and issue the accreditation vote.      5. A specific procedure is in place for informing accredited programs and institutions about the issued preliminary vote.      6. The accrediting body publishes its policies, procedures, criteria, and decisions transparently for public access.      7. The accrediting body issues preliminary accreditation votes during decision-making sessions, based on information in the external evaluation report and other relevant documents, if needed.      8. The accrediting body specifies different types of accreditation votes in its regulations, based on the number of achieved standards.      9. The accreditation certificate specifies the credit period for the issued vote.      10. The accrediting body periodically evaluates programs or institutions according to a defined timeline and has policies and procedures for early evaluation or revision of previous decisions, if necessary. |
| - 1. **Feedback and monitoring**       1. Comprehensive reports, including strengths, weaknesses, and improvement opportunities, are provided to institutions.      2. After issuing an accreditation decision, the accrediting body follows up on the institutions or program’s efforts to address weaknesses and sustain strengths for continuous improvement.      3. The accrediting body continuously monitors programs and institutions, requiring them to report any major changes in the educational program, quality of resources, staff, or other factors that could impact educational quality, so that visits can be scheduled if necessary. |
| - 1. **Revision and appeal**       1. The accrediting body has a specific mechanism for addressing complaints and appeals regarding processes or preliminary votes, with this process communicated to the highest authority of the accredited institutions or programs.      2. Appeals are conducted by a board including members appointed according to accreditation bylaws and individuals who did not participate in the initial vote, with conflicts of interest managed appropriately. |
| 1. **Responsiveness and quality improvement** |
| - 1. **Quality assurance**       1. The accrediting body regularly conducts self-evaluations of its performance, standards, procedures, policies, and activity integrity or entrusts these reviews to competent authorities and uses the results for improvement.      2. The accrediting body provides periodic analytical reports on accreditation activities and outcomes to inform quality improvement policies. |
| - 1. **Accountability and discipline**       1. The accrediting body has a codified policy to prevent and manage conflicts of interest among employees, external evaluators, and accreditation committee members.      2. The accrediting body prepares and publishes integrated reports on quality assurance processes and related activities.      3. Accreditation decisions are made publicly available in an appropriate format for accredited programs and institutions. |
| - 1. **Maintenance of records**       1. Records of accreditation activities and related correspondence are maintained by the accrediting body in an organized and retrievable manner.      2. The accrediting body uses secure methods to protect accreditation records and data stored in its online accreditation system. |

Table 7: Finalized Standards for the Meta-Accreditation System
