# Supplementary material for: Developing the Standards of Meta-accreditation System of Educational Accreditation Systems in Iran
Source: Research Square preprint supplement (doi:10.21203/rs.3.rs-6768707/v1), 2025-07-10
Supplement: Supplementary file 2 [file 6b7cd56c0993b04c3fa187c5.docx]

1. Talk about your own experiences in accreditation.

2. Have the results of accreditations carried out in the country achieved exactly the goal for which the educational accreditation system was implemented? What points for improvement and strengths do you think are there in the accreditations carried out?

3. As an evaluator/expert, to what extent are you confident in the results of accreditations carried out in the entire health education system of the country? Where does this confidence or lack of confidence come from?

4. Do you think it is necessary to control or review the accreditations carried out?

5. What categories - indicators - should the meta-accreditation process (accreditation assessment) include? On which components of accreditation should the main focus of meta-accreditation be? (Process - Assessors - Results - Executive Structure)

6. In your opinion, which institution and authority can be the responsible body for meta-accreditation?

7. What structure and hierarchy do you propose for meta-accreditation? (Components such as decision-making authority, results of meta-accreditation (consequences of meta-accreditation), meta-accreditation evaluators and its executive trustees, decision-making process, time sequence of meta-accreditation, etc.)

8. What is your proposal regarding the process of implementing meta-accreditation?
